# Supplementary material for: Development and Application of the SmartAQ High-Resolution Air Quality and Source Apportionment Forecasting System for European Urban Areas
Source: MDPI journal article supplement (doi:10.3390/atmos13101693), 2022-10-16
Supplement: s1 [file s1]

Supplementary

# Development and Application of the SmartAQ High-Resolution Air Quality and Source Apportionment Forecasting System for European Urban Areas

Evangelia Siouti <sup>1,2</sup>, Ksakousti Skyllakou <sup>2</sup>, Ioannis Kioutsoukis <sup>3</sup>, David Patoulas <sup>2</sup>, George Fouskas <sup>2</sup> and Spyros N. Pandis <sup>1,2,\*</sup>

<sup>1</sup> Department of Chemical Engineering, University of Patras, Patras, Greece

<sup>2</sup> Institute of Chemical Engineering Sciences (ICE-HT), Foundation for Research and Technology Hellas (FORTH), Patras, Greece

<sup>3</sup> Department of Physics, University of Patras, Patras, Greece

\* Correspondence: spyros@chemeng.upatras.gr (Spyros N. Pandis)

**Table S1.** Individual compounds simulated by MEGAN.

| Compounds          |
|--------------------|
| Alkanes            |
| Olefins            |
| Aromatics          |
| Nitrogen dioxide   |
| Nitrogen monoxide  |
| Ammonia            |
| Carbon monoxide    |
| Ethene             |
| Methane            |
| Methanol           |
| Acetone            |
| Acetaldehyde       |
| Formaldehyde       |
| Benzaldehyde       |
| Higher aldehydes   |
| Methylethyl ketone |
| Formic acid        |
| Acetic acid        |
| Pyruvic acid       |
| Methyl acetate     |

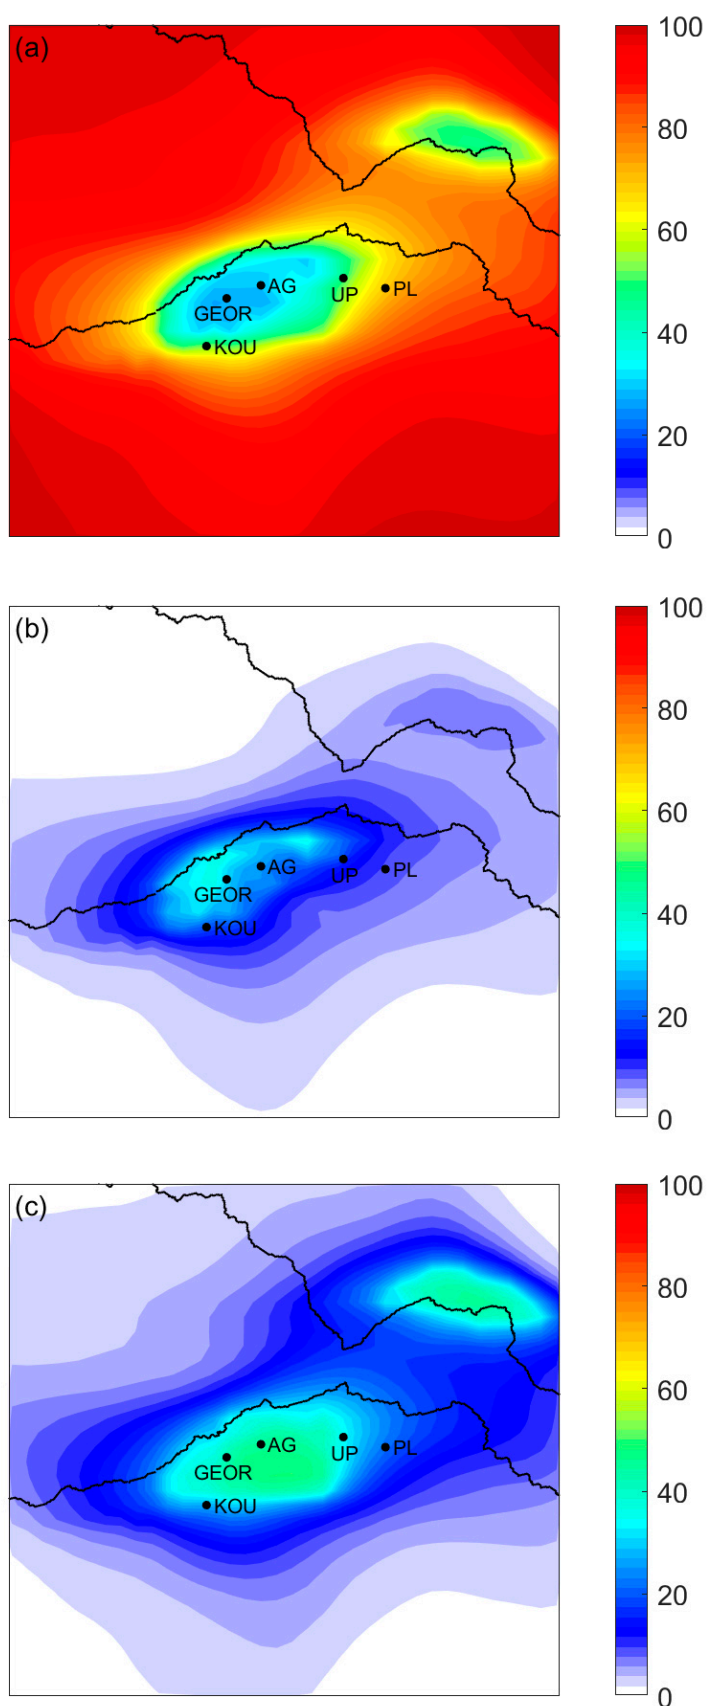

**Figure S1.** Contribution (%) of fine EC (a) from LRT, (b) from transportation and (c) from other sources to total fine EC during July 2021 for the domain of Patras.

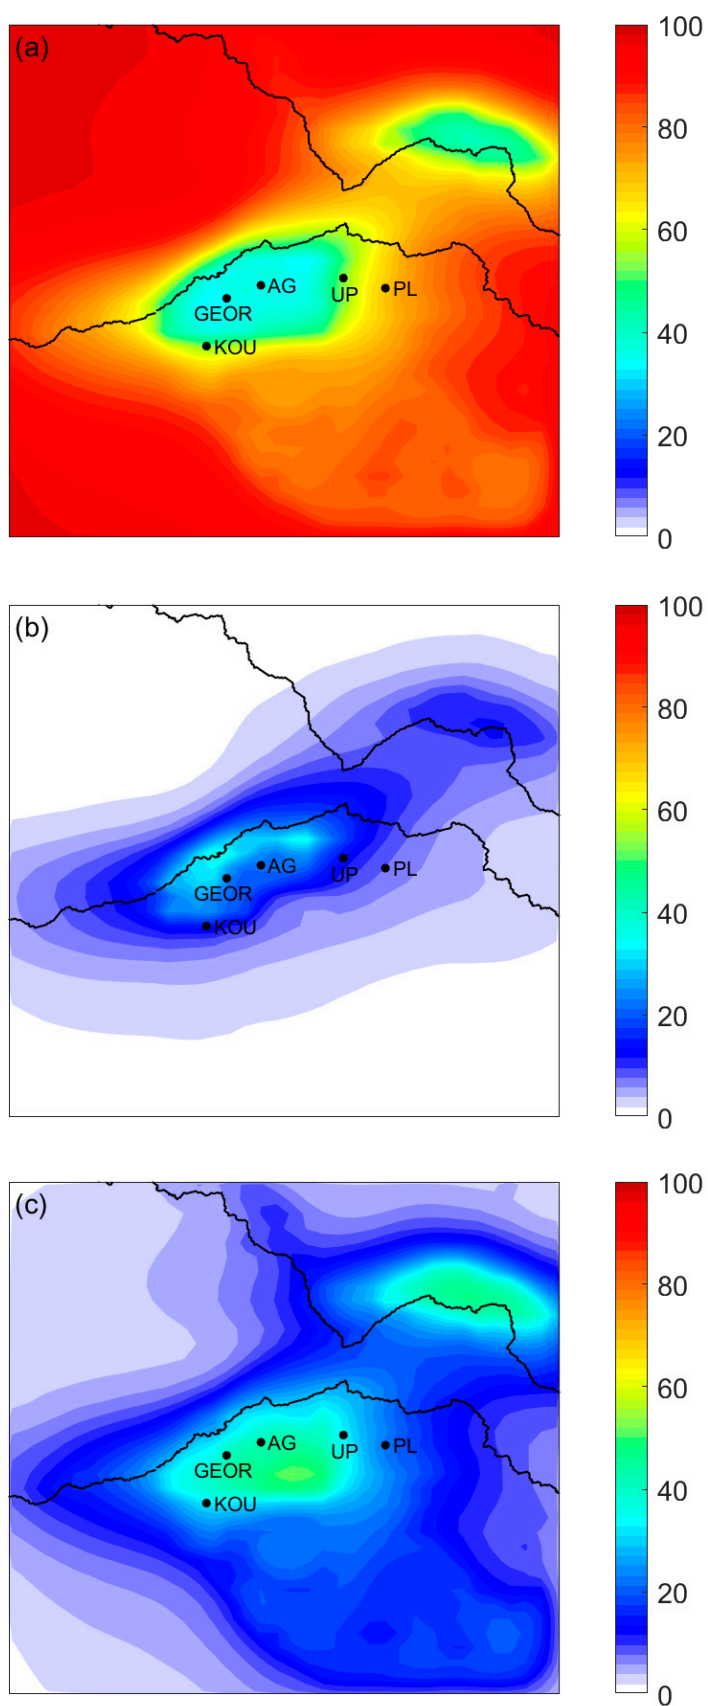

**Figure S2.** Contribution (%) of fine EC (a) from LRT, (b) from transportation and (c) from other sources to total fine EC during December 2021 for the domain of Patras.

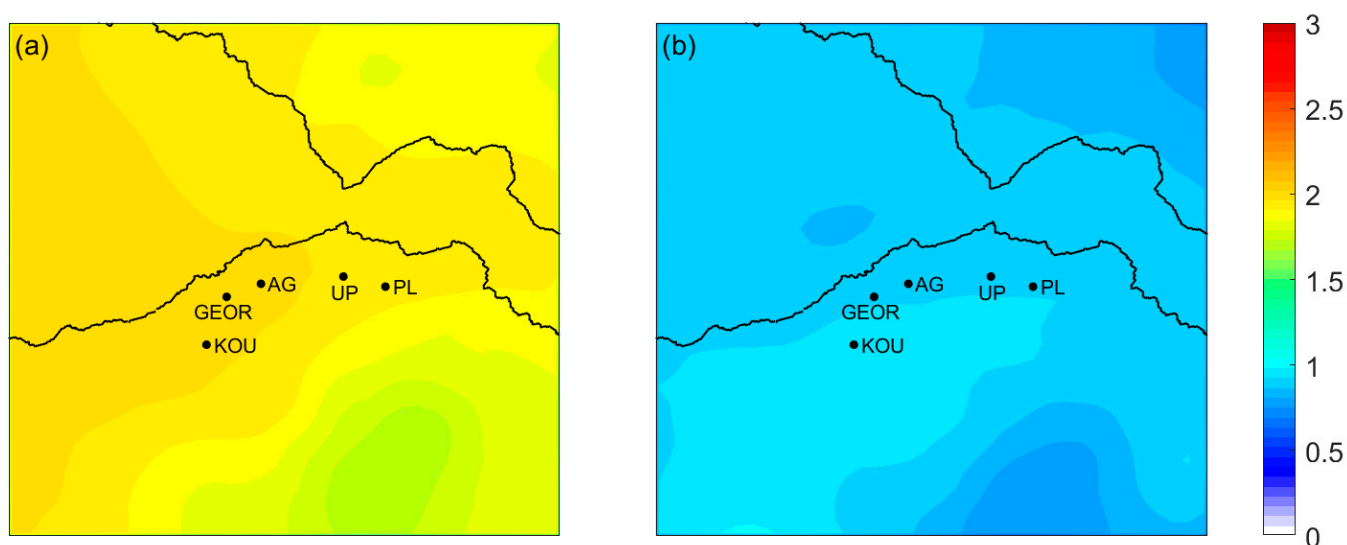

**Figure S3.** Predicted average ground concentrations ( $\mu\text{g m}^{-3}$ ) of fine secondary OA during (a) July 2021 and (b) December 2021 for the urban domain of Patras at  $1 \times 1 \text{ km}^2$  resolution.

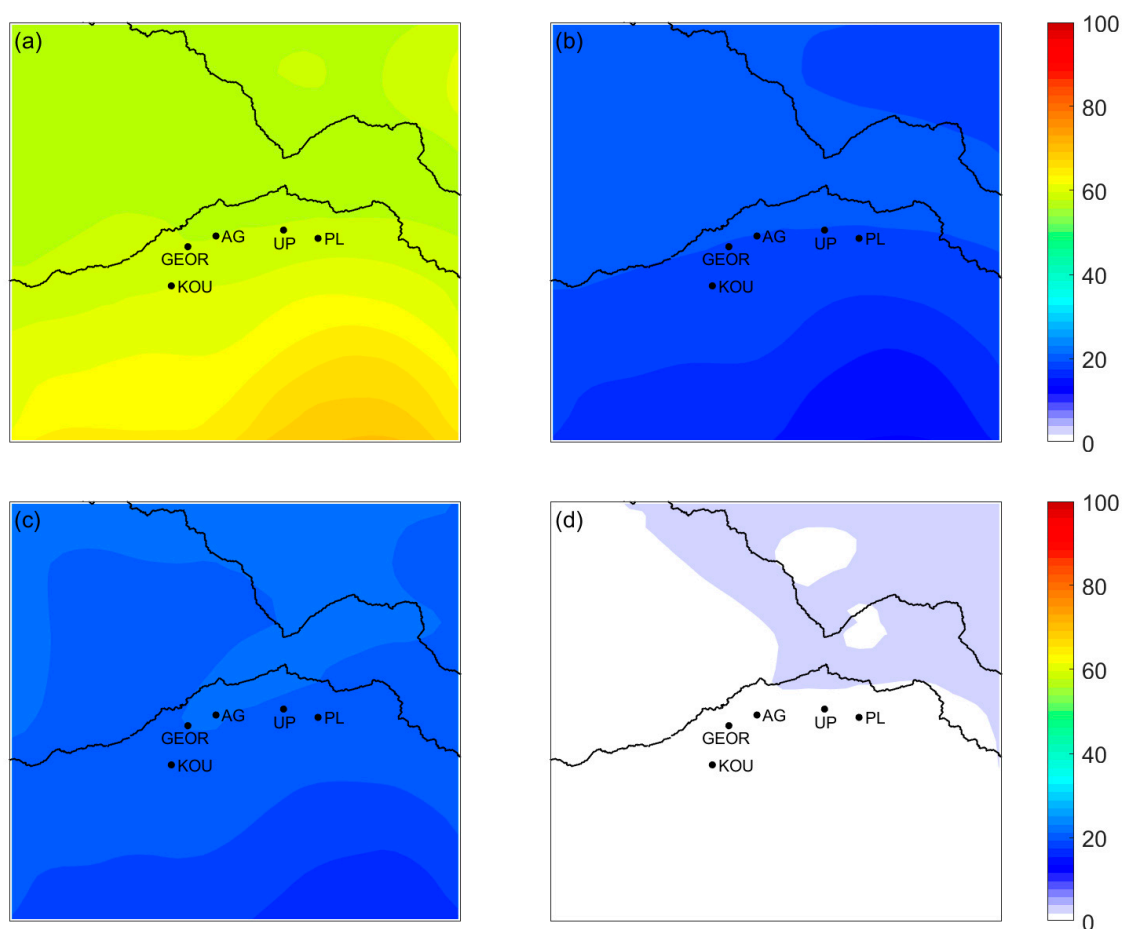

**Figure S4.** Contribution (%) of (a) LRT, (b) oxidized, (c) anthropogenic and (d) biogenic fine secondary OA to total fine secondary OA during July 2021 for the urban domain.

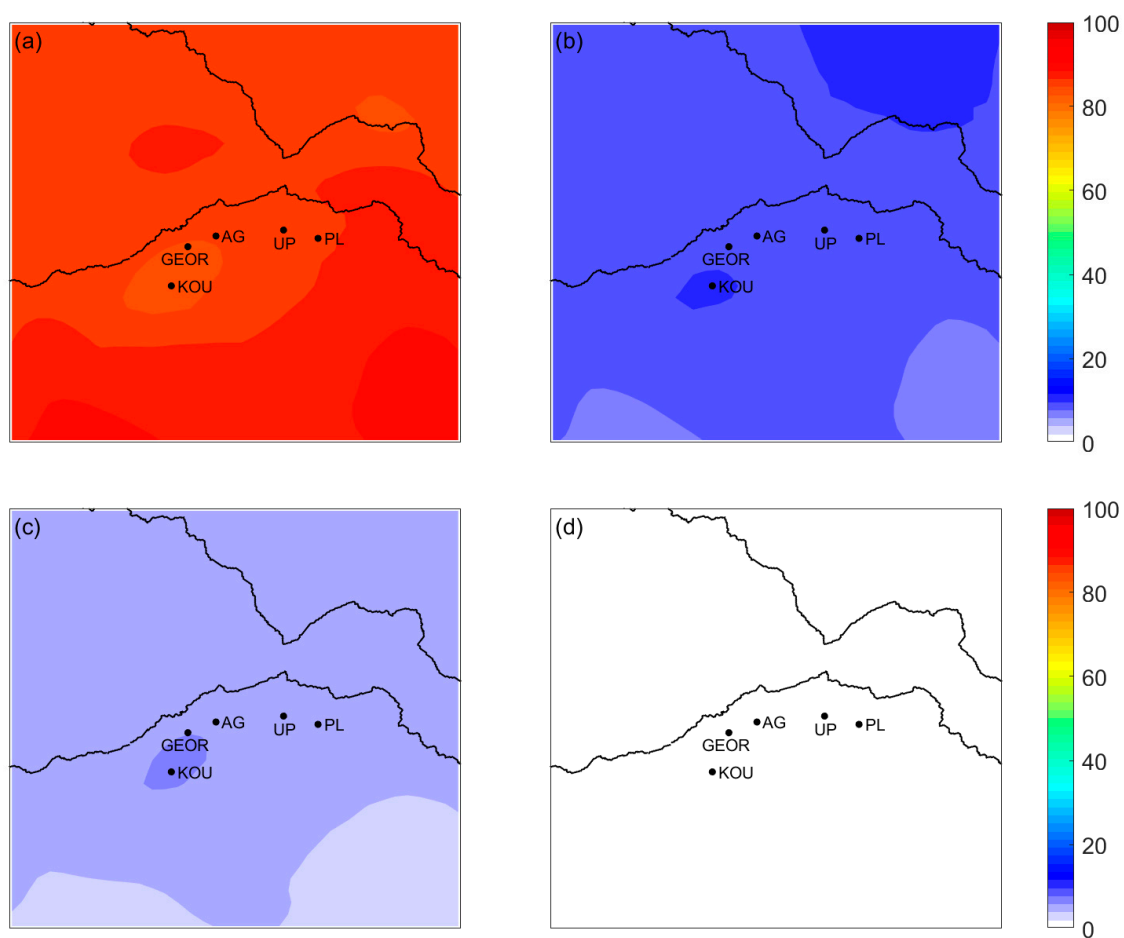

**Figure S5.** Contribution (%) of (a) LRT, (b) oxidized, (c) anthropogenic and (d) biogenic fine secondary OA to total fine secondary OA during December 2021 for the urban domain of Patras.

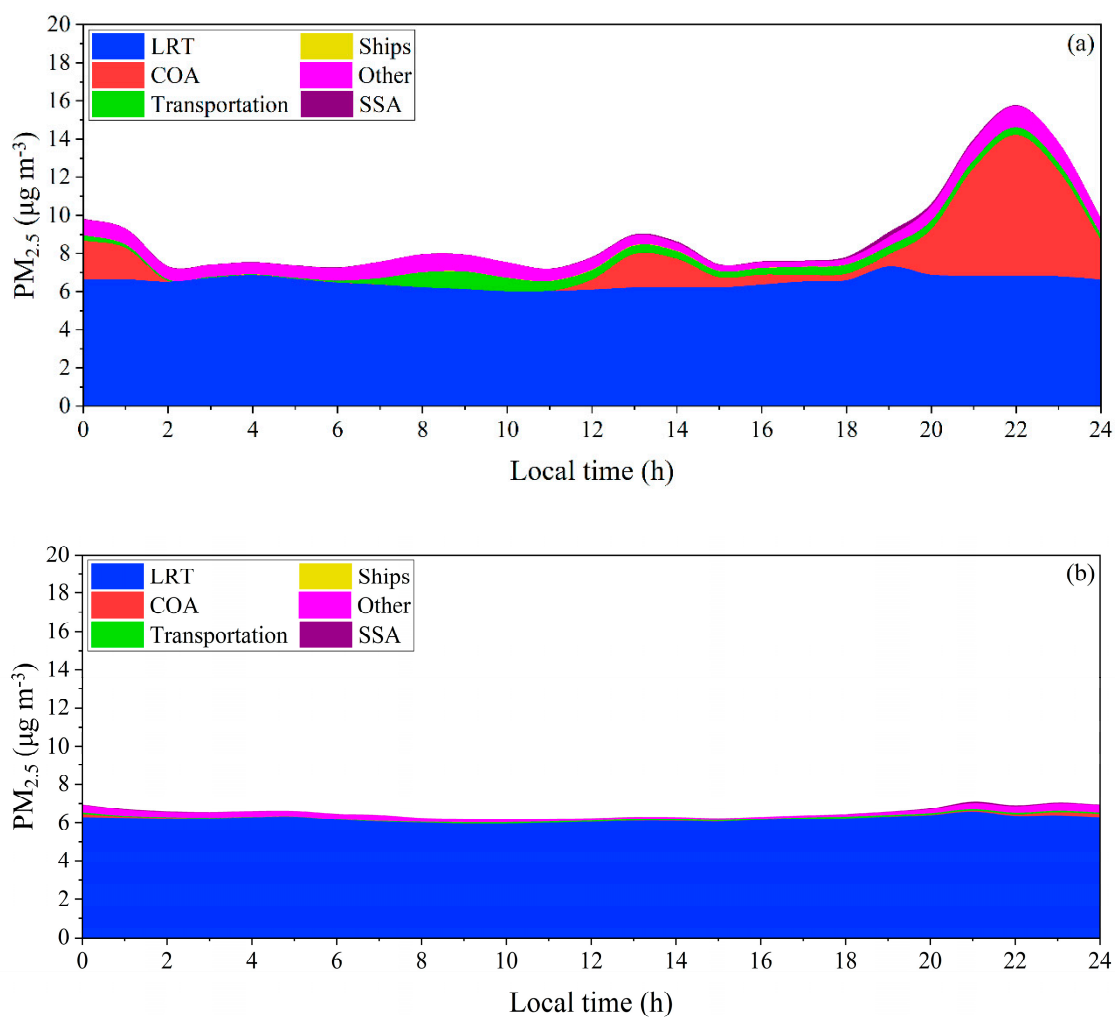

**Figure S6.** Average diurnal profile of  $PM_{2.5}$  sources in (a) Georgiou Sq. and (b) Platani during July 2021 for the urban domain of Patras.

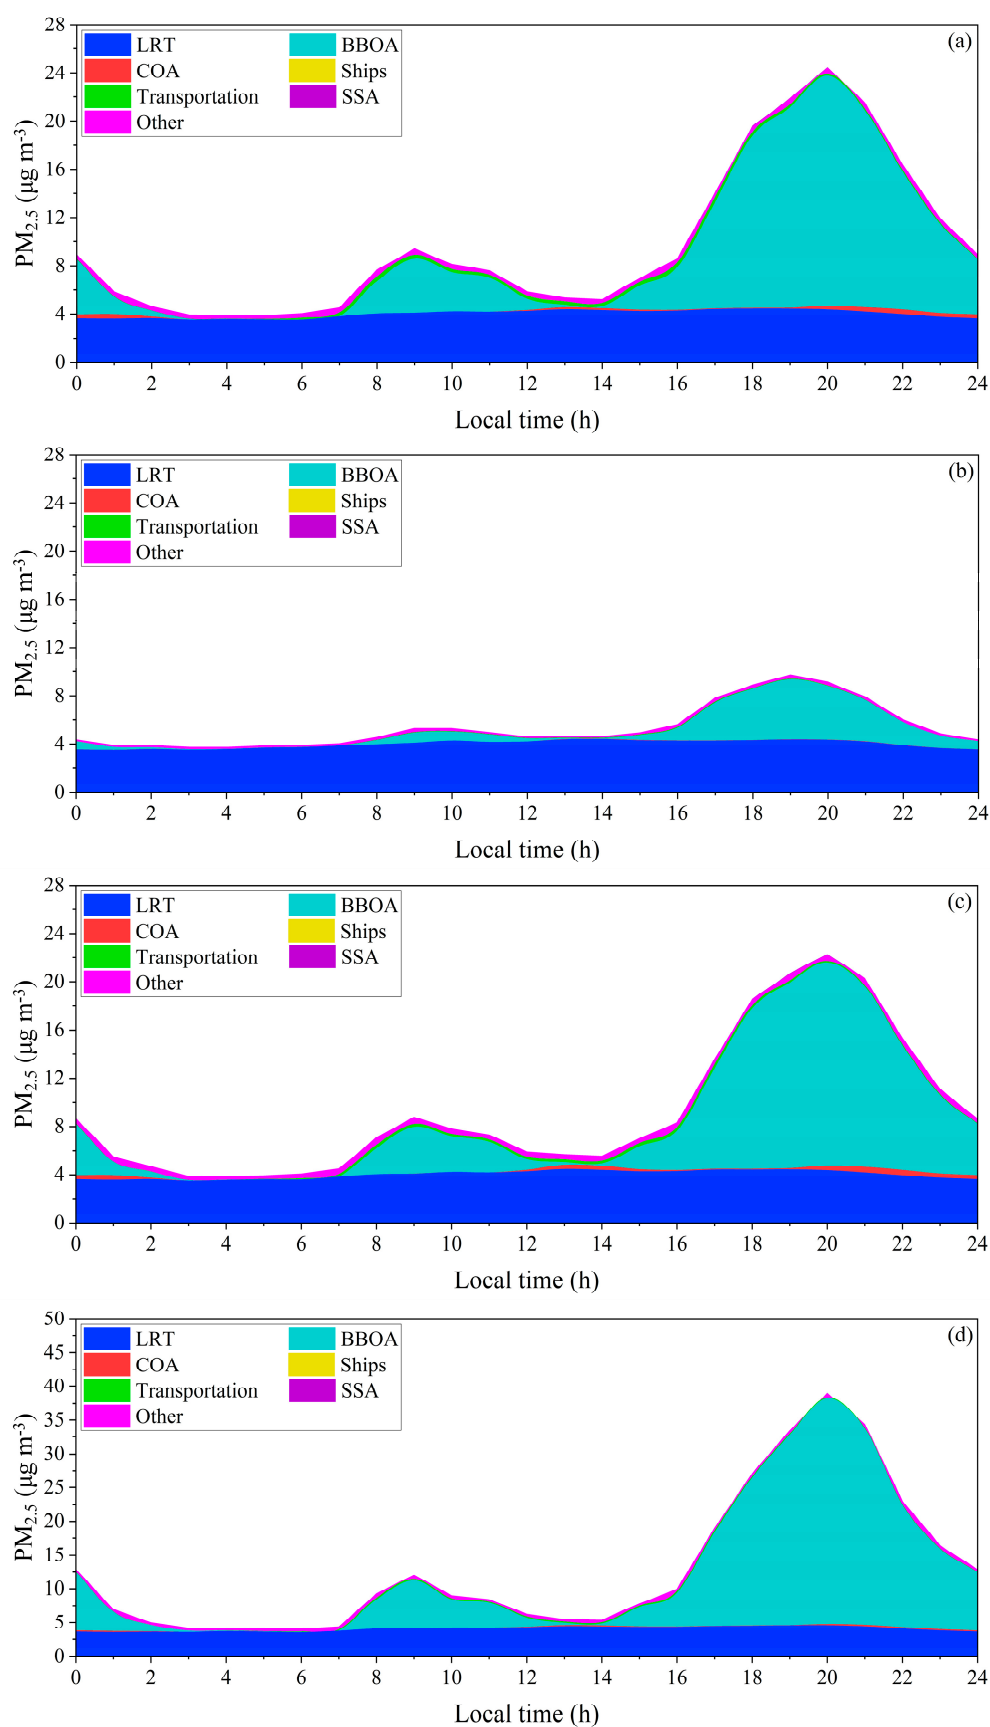

**Figure S7.** Average diurnal profile of  $PM_{2.5}$  sources in (a) Georgiou Sq., (b) Platani, (c) Agia and (d) Kypseli during December 2021 for the urban domain of Patras.
